# Supplementary material
Source: publisher figshare collection journal article supplement (https://sage.figshare.com/ndownloader/files/12856337)
Supplement: Supplementary file 1 [file 12856337]

## Additional Quantitative Results

### Factor Analysis of Bullying Intervention Questionnaire Items

To create composite variables with the items on the bystander behaviour scale, factor analysis was utilized to confirm how the items should be divided. Analyses indicated similar results for each scenario/subtype. Two distinct factors were revealed. Through an exploration of the pattern matrix for each of the four loadings, and using a cut-off value of .45 (20% variance; Tabachnick & Fidell, 2013), the first component reflected intervening in a bullying situation, while the second component reflected taking the side of the bully.

### Intervention Variable.

In a regression with intervention as the outcome variable, empathy ( $p = .042$ ) and friendship quality ( $p = .048$ ) were found to be significant predictors. Individuals who reported lower friendship quality with his/her best friend and scored higher on the empathy scale were more likely to state that the bystander in the bullying scenarios would intervene.

Table 4.

#### *Regression Predicting Intervention with Empathy and Friendship*

| Variable | <i>B</i> | SE (B) | $\beta$ | $sr^2$ |
|----------|----------|--------|---------|--------|
| Step 1   |          |        |         |        |
| Age      | -.047    | .047   | -.108   |        |
| Sex      | -.074    | .159   | -.049   |        |
| $R^2$    | .013     |        |         |        |
| $F$      | .596     |        |         |        |
| Step 2   |          |        |         |        |
| Age      | -.046    | .046   | -.105   |        |
| Sex      | -.092    | .167   | -.061   |        |

|            |       |      |        |      |
|------------|-------|------|--------|------|
| Empathy    | .360  | .174 | .245*  | .046 |
| Friendship | -.310 | .155 | -.235* | .043 |
| $R^2$      | .078  |      |        |      |
| $F$        | 1.817 |      |        |      |

Note: Sex was coded as 1 = boy, 2 = girl.

\* $p < .05$ .

Two additional regression analyses were run with intervention as the outcome variable in order to examine individual differences. In a first regression, the four temperament factors of Rothbart's temperament scale (Surgency, Effortful Control, Affiliation, Negative Affect) were examined, whereas the second regression examined the antisocial traits of the HEXACO personality scale (Honesty-Humility, Emotionality, Agreeableness). None of the traits were found to be significant in these analyses.

Table 5. *Regression Predicting Intervention with Temperament Factors*

| Variable          | $B$   | SE (B) | $\beta$ |
|-------------------|-------|--------|---------|
| Step 1            |       |        |         |
| Age               | -.090 | .049   | -.203   |
| Sex               | -.096 | .156   | -.065   |
| $R^2$             | .040  |        |         |
| $F$               | 1.23  |        |         |
| Step 2            |       |        |         |
| Age               | -.107 | .051   | -.240   |
| Sex               | -.148 | .162   | -.100   |
| Surgency          | .100  | .185   | .060    |
| Effortful Control | -.218 | .156   | -.161   |
| Affiliation       | .125  | .122   | .119    |
| Negative Affect   | -.252 | .137   | -.209   |
| $R^2$             | .093  |        |         |
| $F$               | 1.23  |        |         |

Table 5. *Regression Predicting Intervention with Personality Traits*

| Variable | $B$ | SE (B) | $\beta$ |
|----------|-----|--------|---------|
|----------|-----|--------|---------|

|                  |  |       |      |       |
|------------------|--|-------|------|-------|
| <hr/>            |  |       |      |       |
| Step 1           |  |       |      |       |
| Age              |  | -.068 | .049 | -.148 |
| Sex              |  | -.057 | .164 | -.037 |
| $R^2$            |  | .022  |      |       |
| $F$              |  | .993  |      |       |
| Step 2           |  |       |      |       |
| Age              |  | -.072 | .053 | -.157 |
| Sex              |  | -.144 | .178 | -.093 |
| Honesty-Humility |  | .109  | .192 | -.067 |
| Emotionality     |  | .251  | .154 | .187  |
| Agreeableness    |  | .147  | .139 | .144  |
| $R^2$            |  | .067  |      |       |
| $F$              |  | 1.20  |      |       |
| <hr/>            |  |       |      |       |
